# Supplementary material
Source: publisher site journal article supplement (https://www.dovepress.com/get_supplementary_file.php?f=329621.docx)
Supplement: Supplementary file 1 [file get_supplementary_file.php]

**Supplementary** **materials**
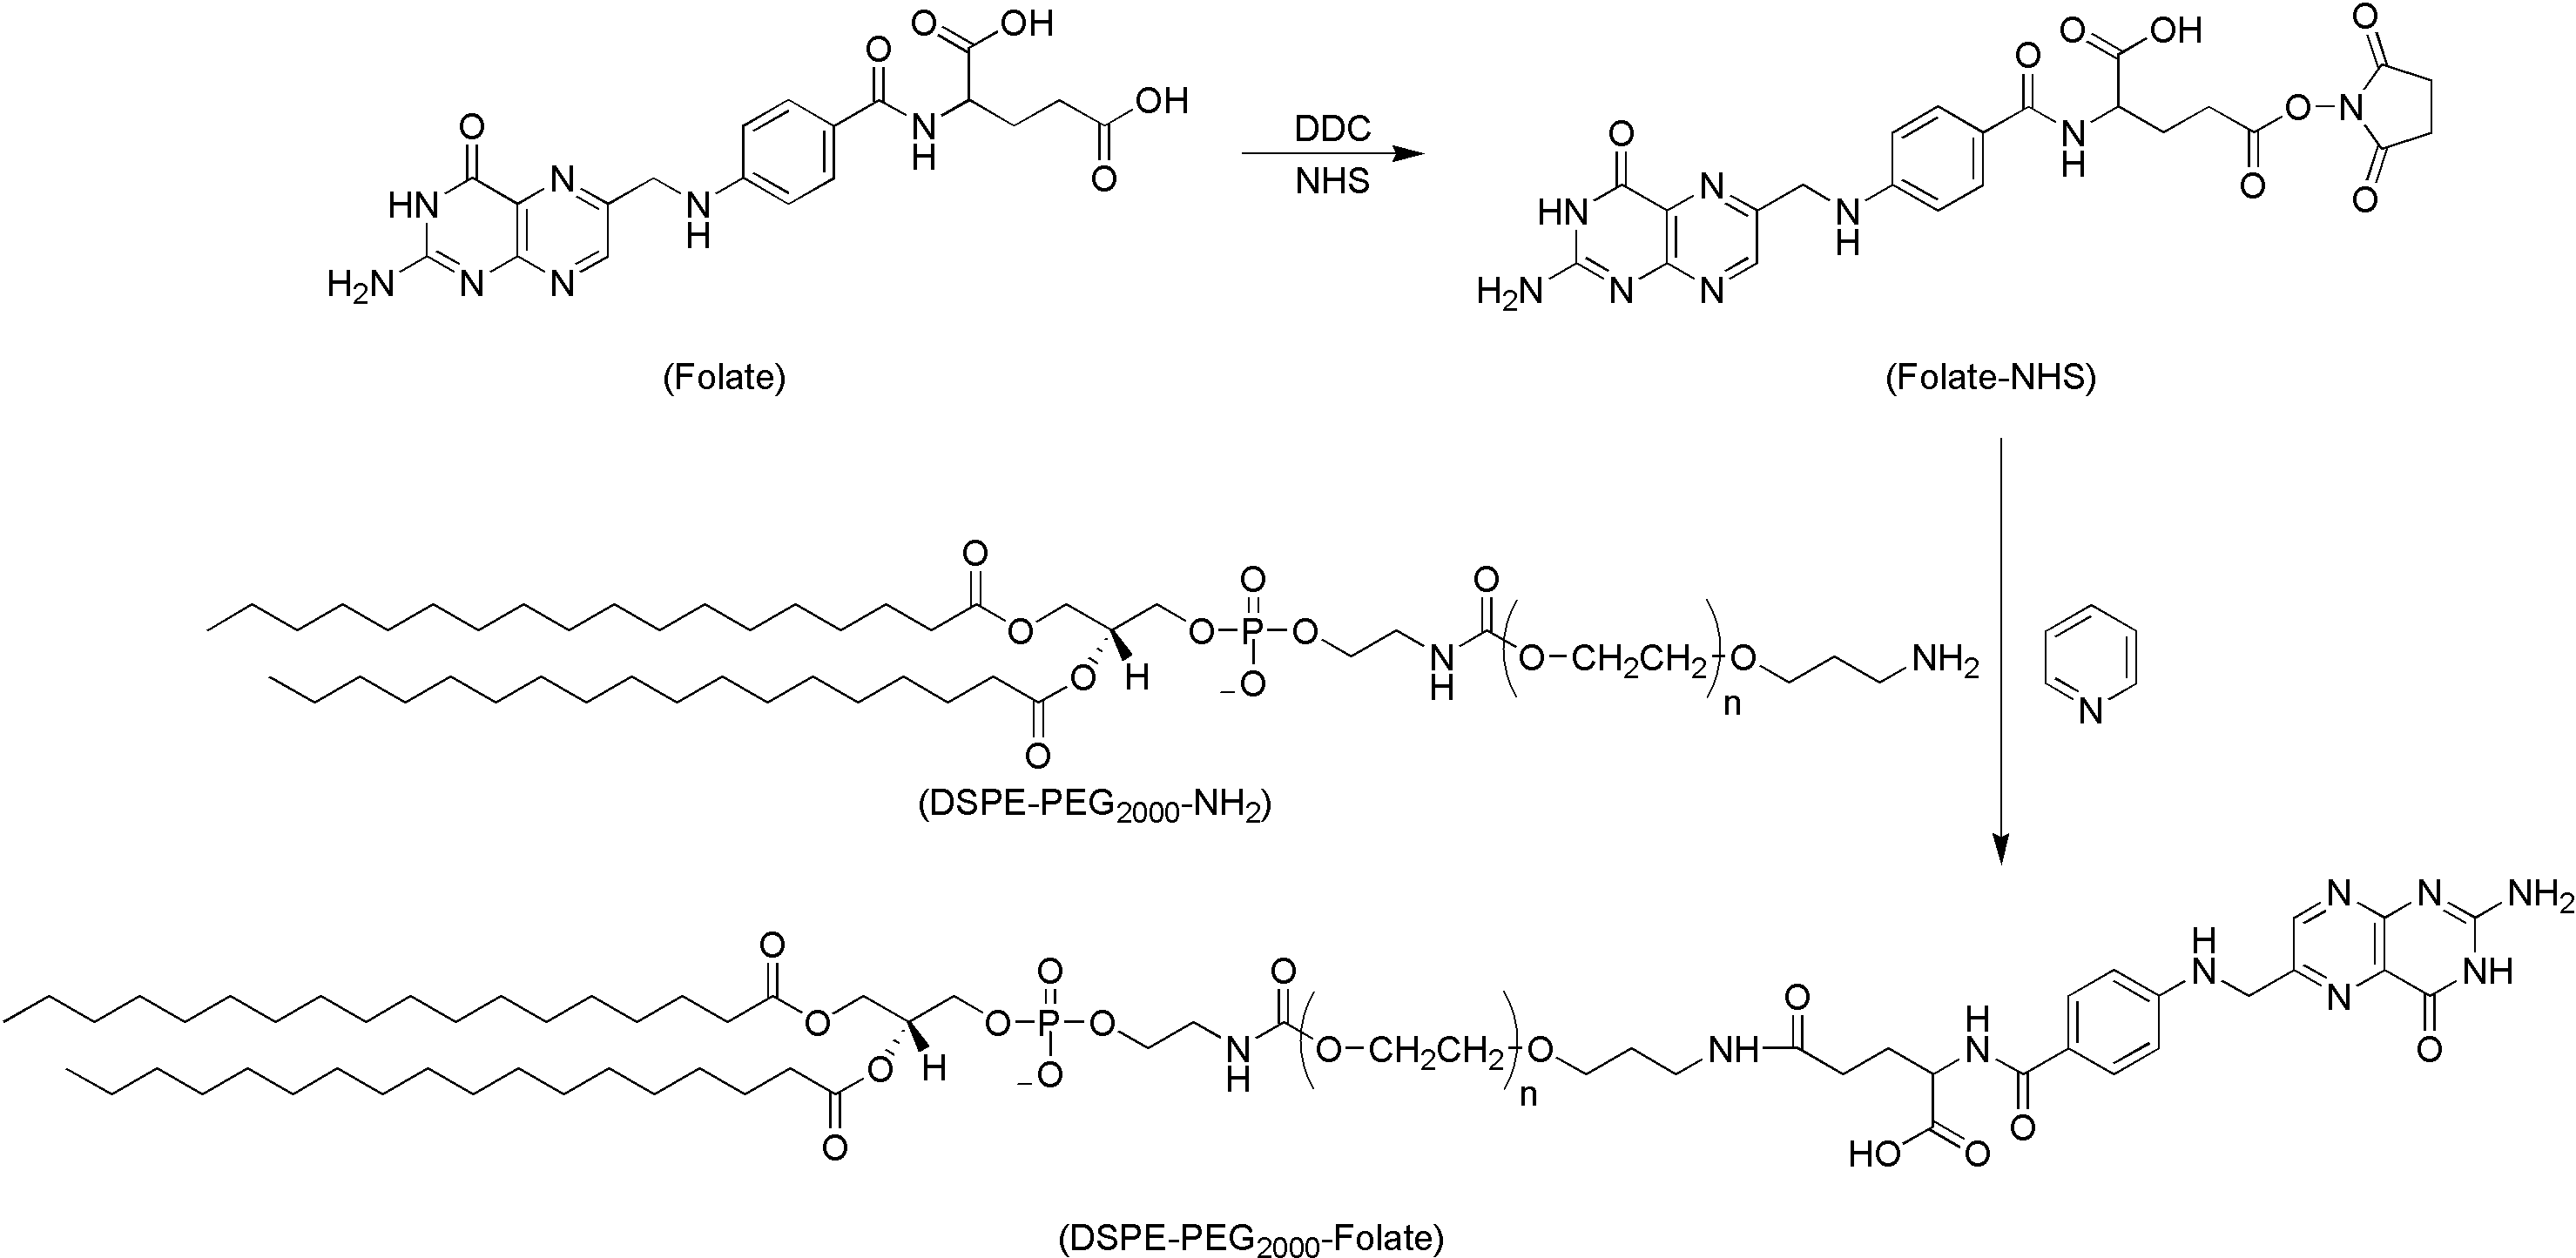


**Figure S1.** Synthetic scheme for preparation of DSPE-PEG-Folate. Reagents and conditions.

**
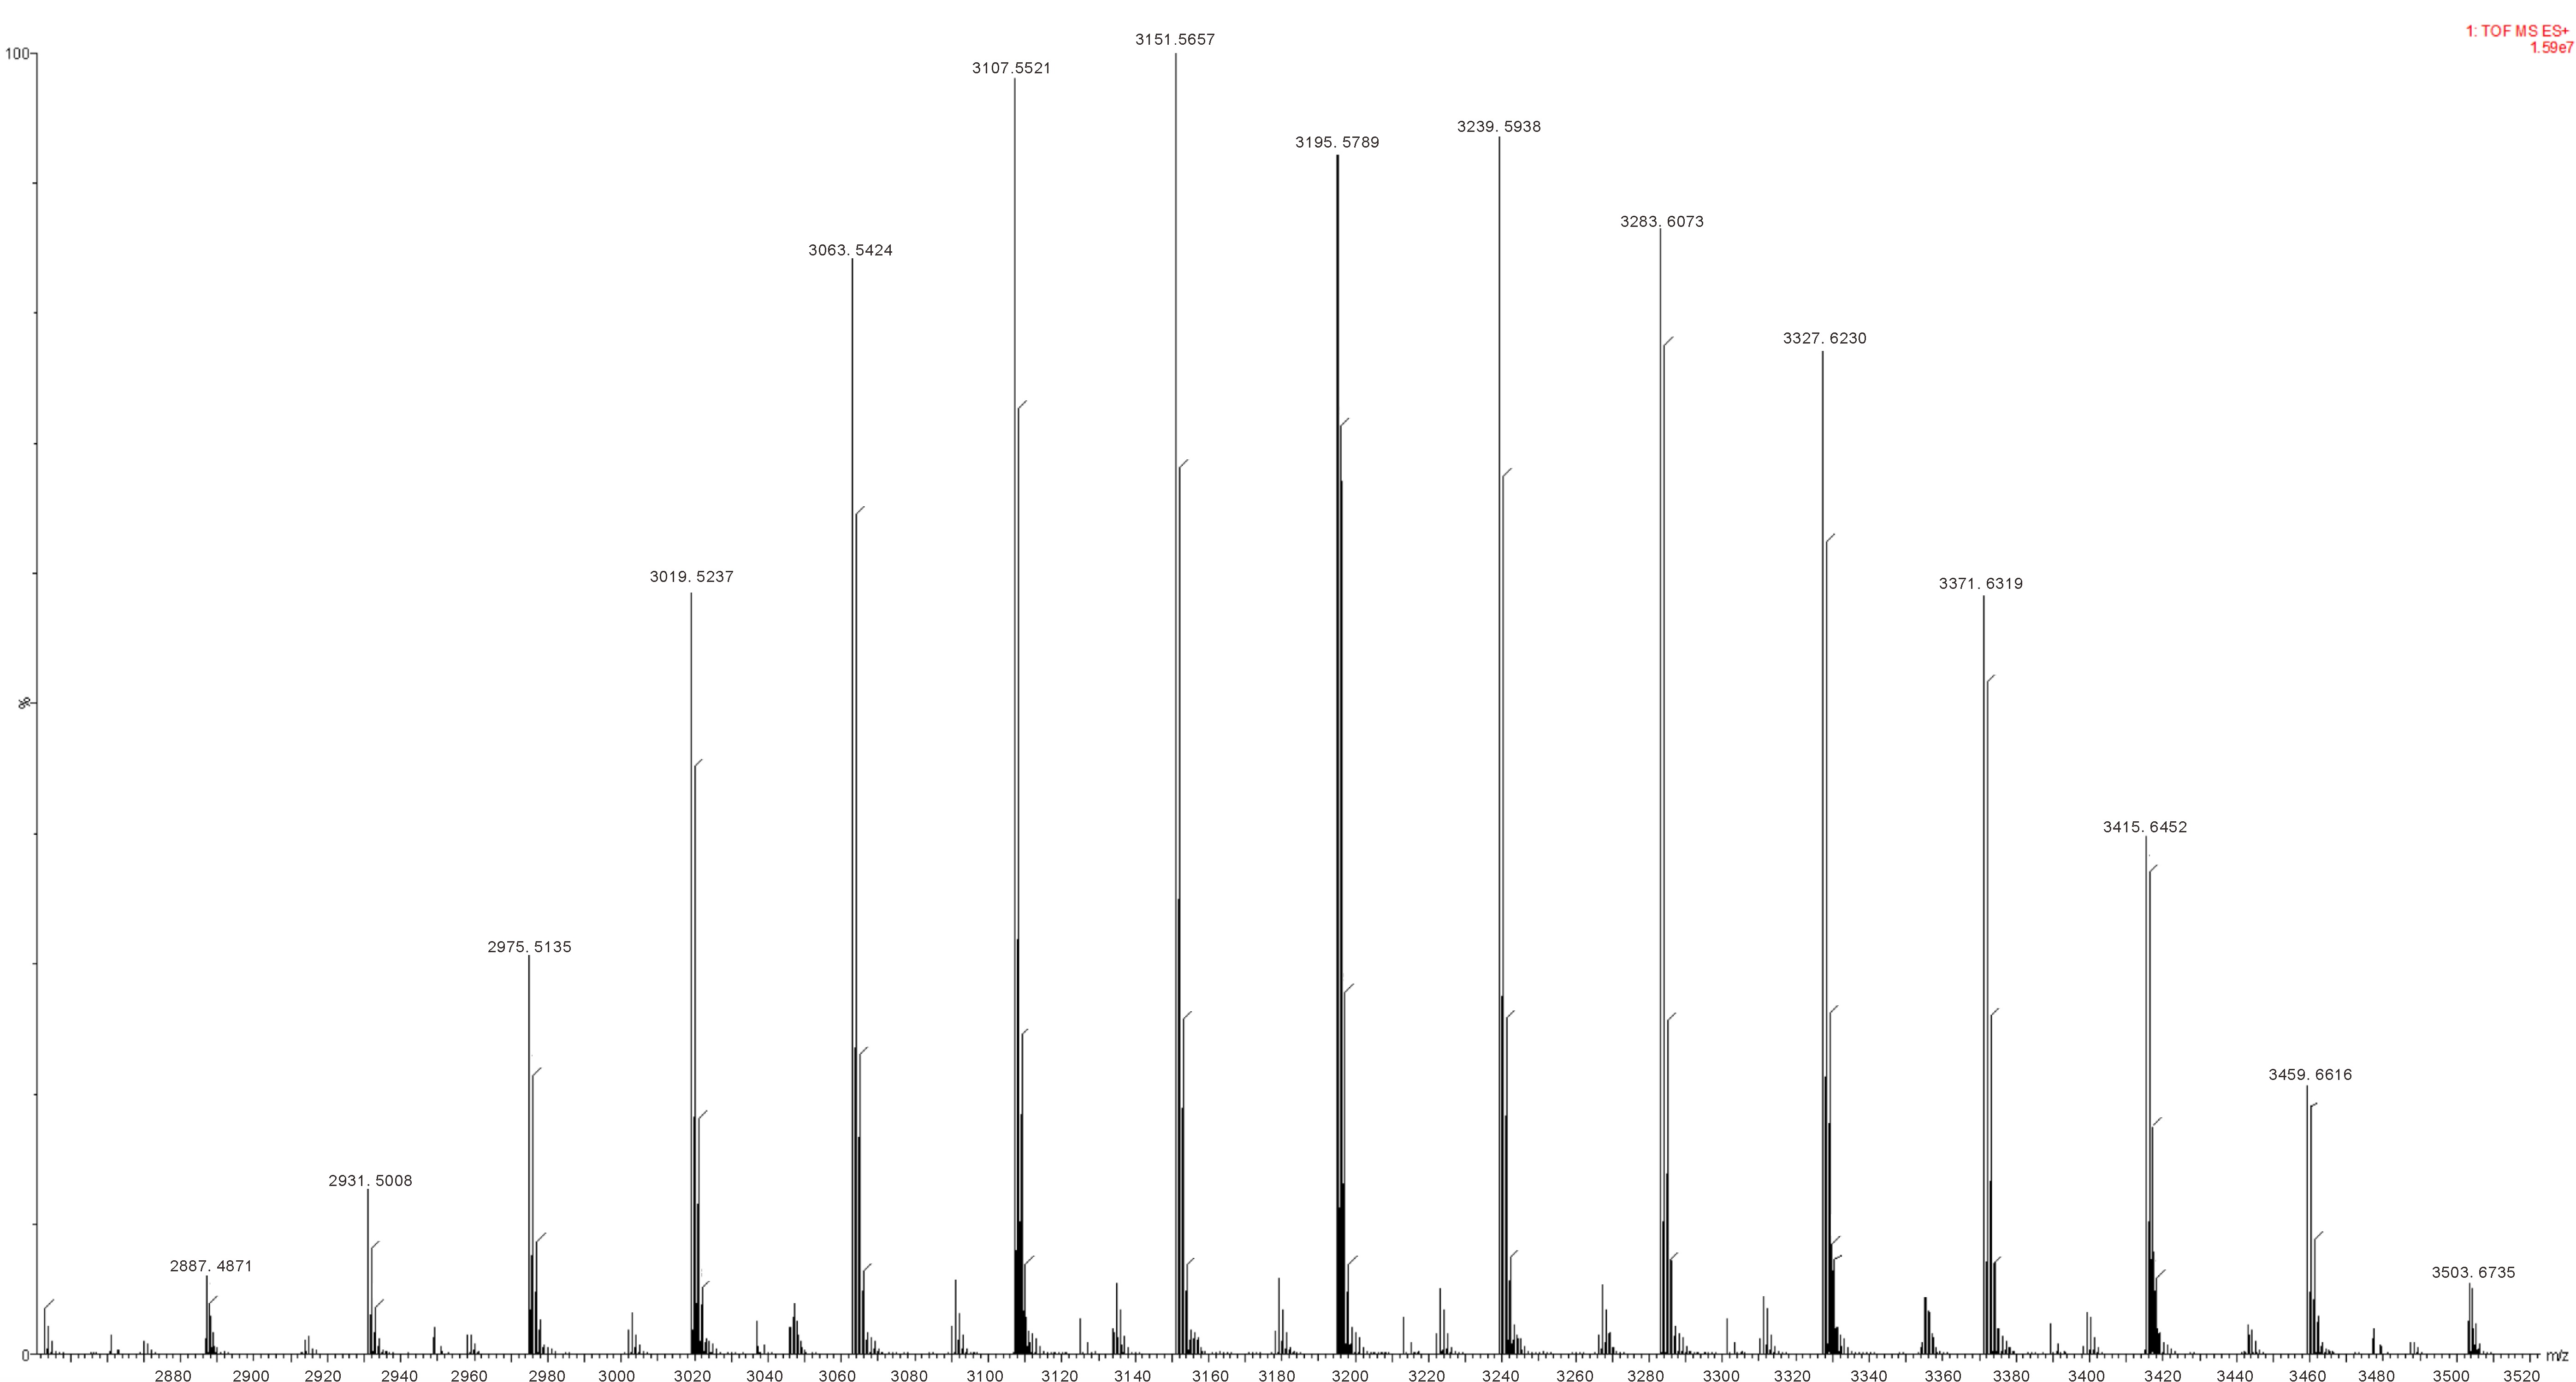
**

**Figure S2.** The mass spectra of DSPE-PEG2000-Folate.

**
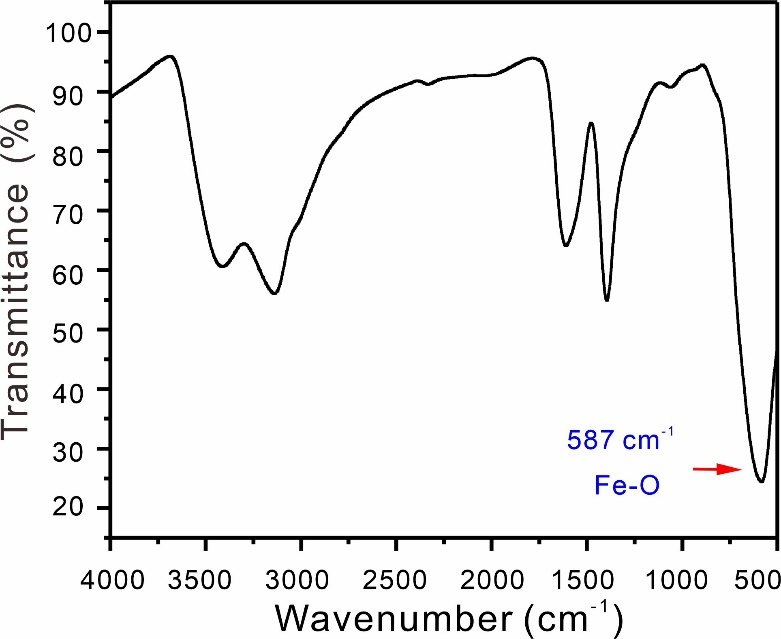
**

**Figure S3.** Infrared spectra of Fe3O4 Magnetic nanoparticles (MNPs).

**
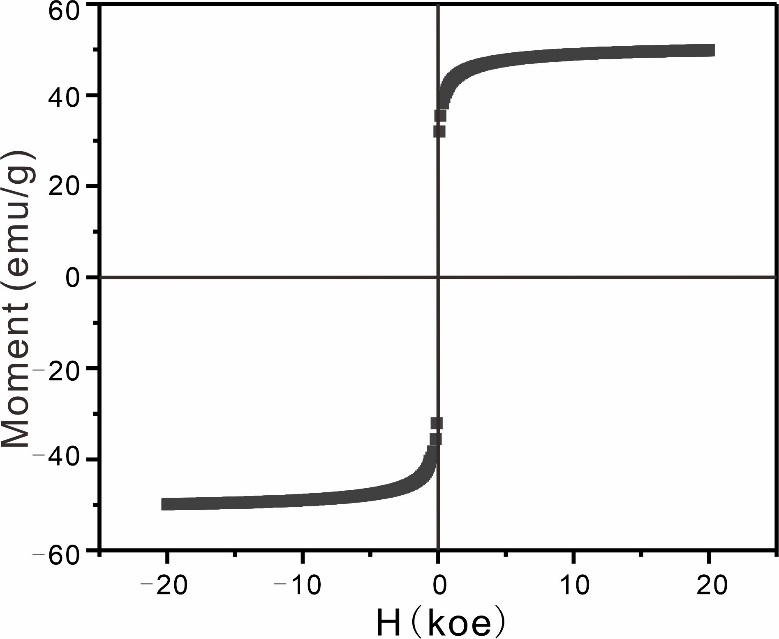
**

**Figure S4.** Magnetic hysteresis loop of the MNPs measured at room temperature.

**
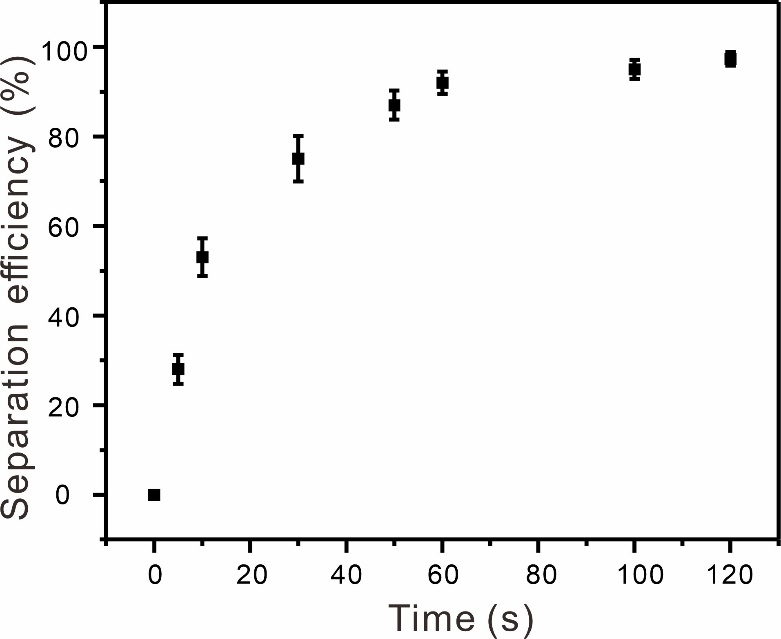
**

**Figure S5.** Capture efficiencies of MNPs at different attraction times with a commercial magnetic scaffold.

**
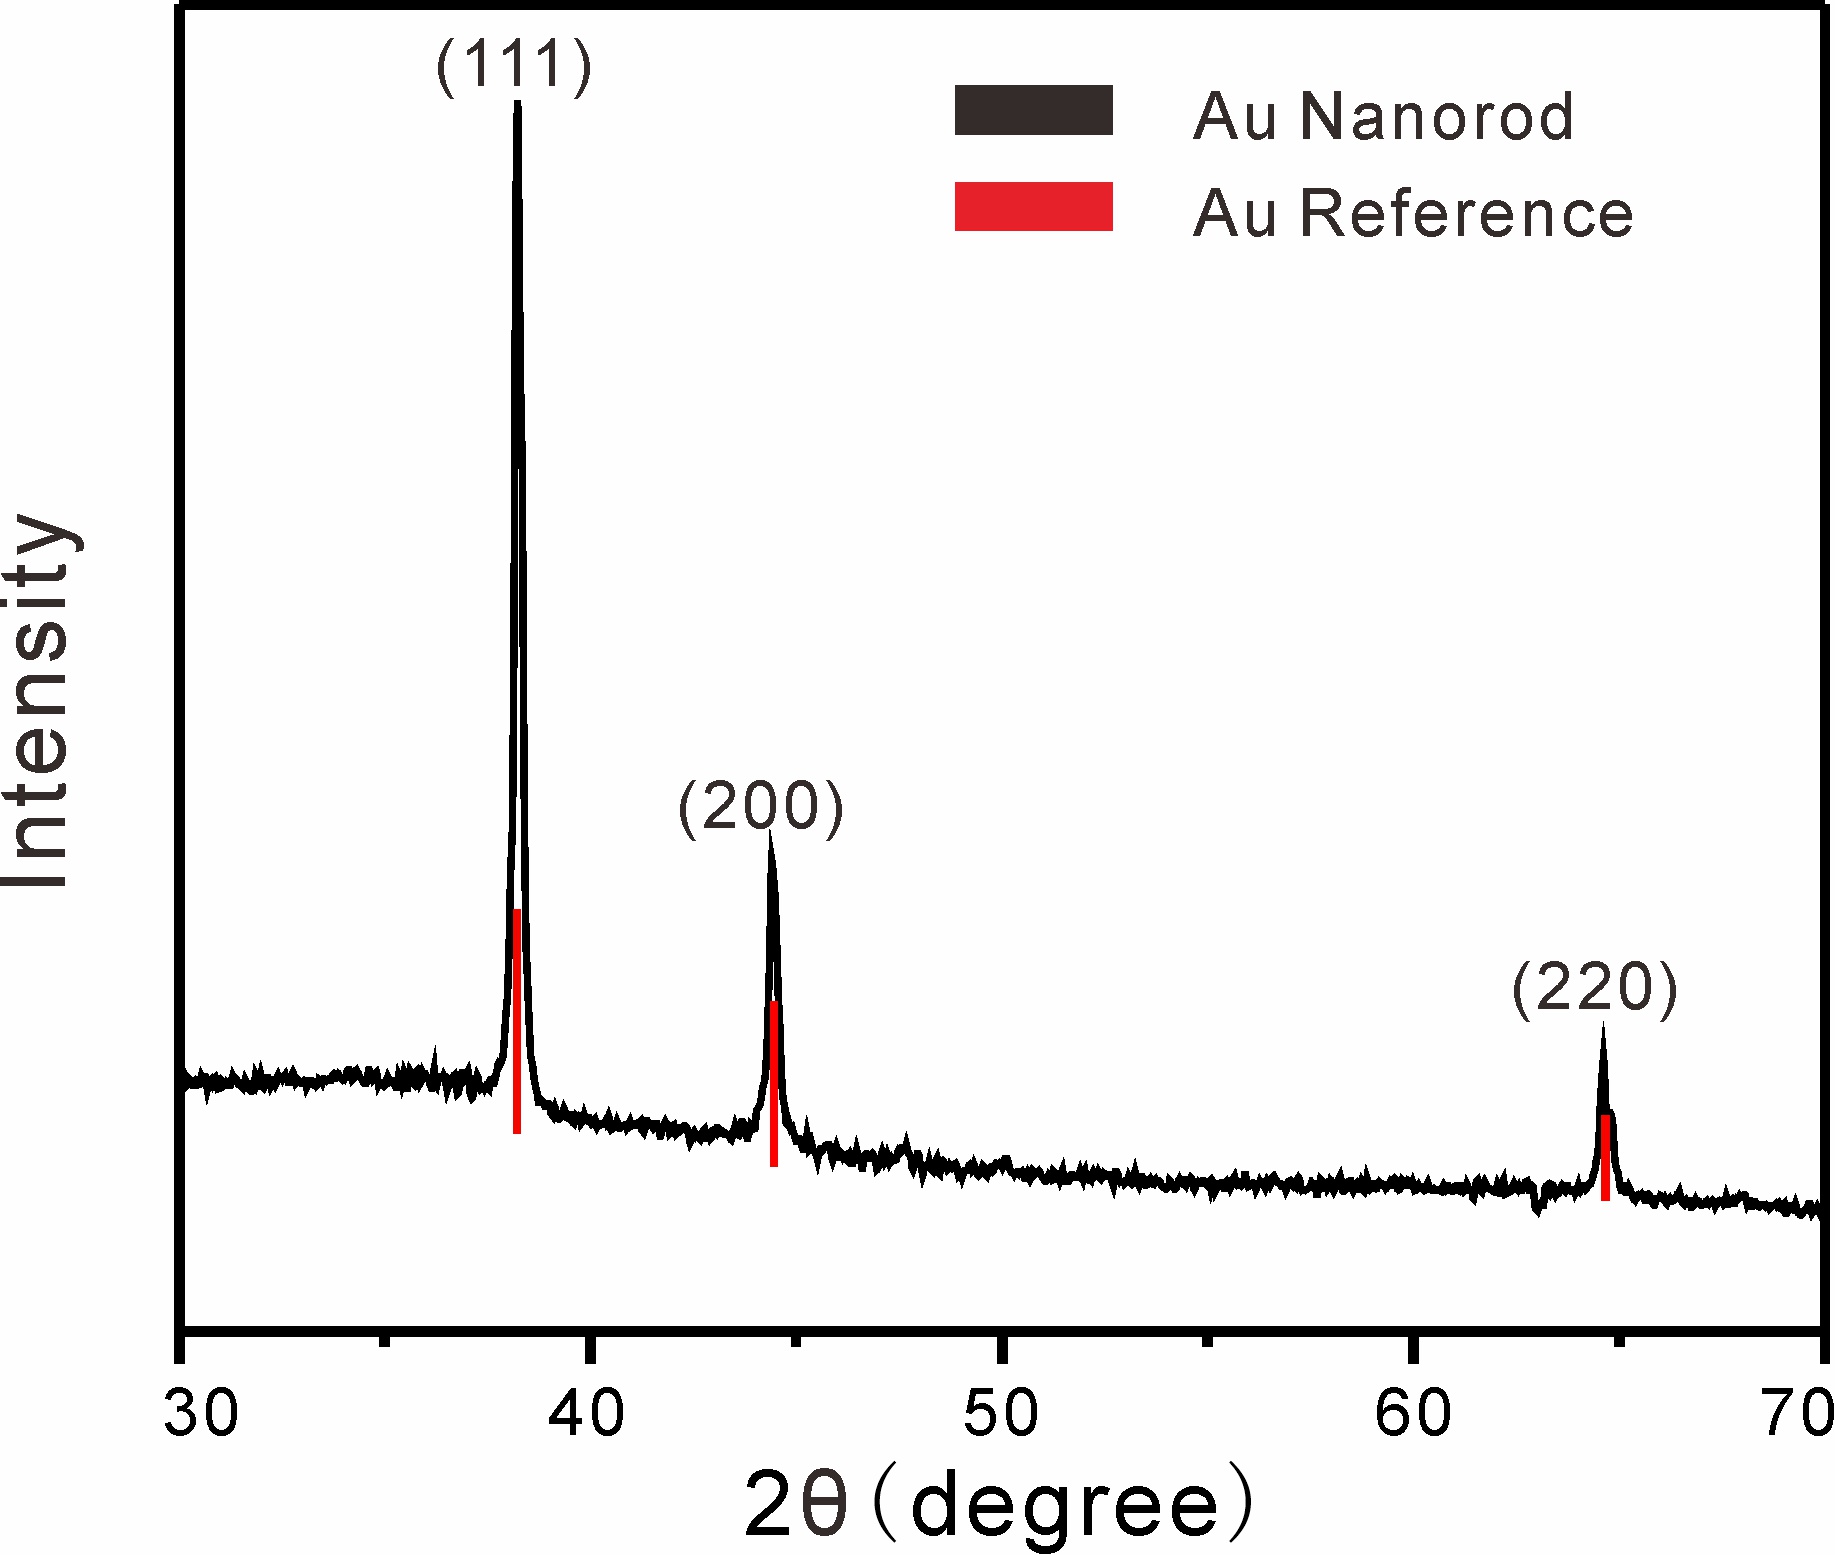
**

**Figure S6.** XRD patterns of GNRs obtained by using seed mediated growth method.

Note: Data from Nikoobakht and El-Sayed1 was used for comparison.


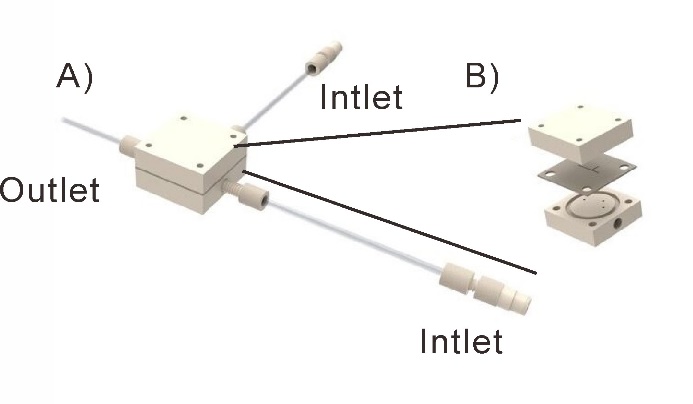


**Figure S7.** Schematic diagram of chip structure.

**
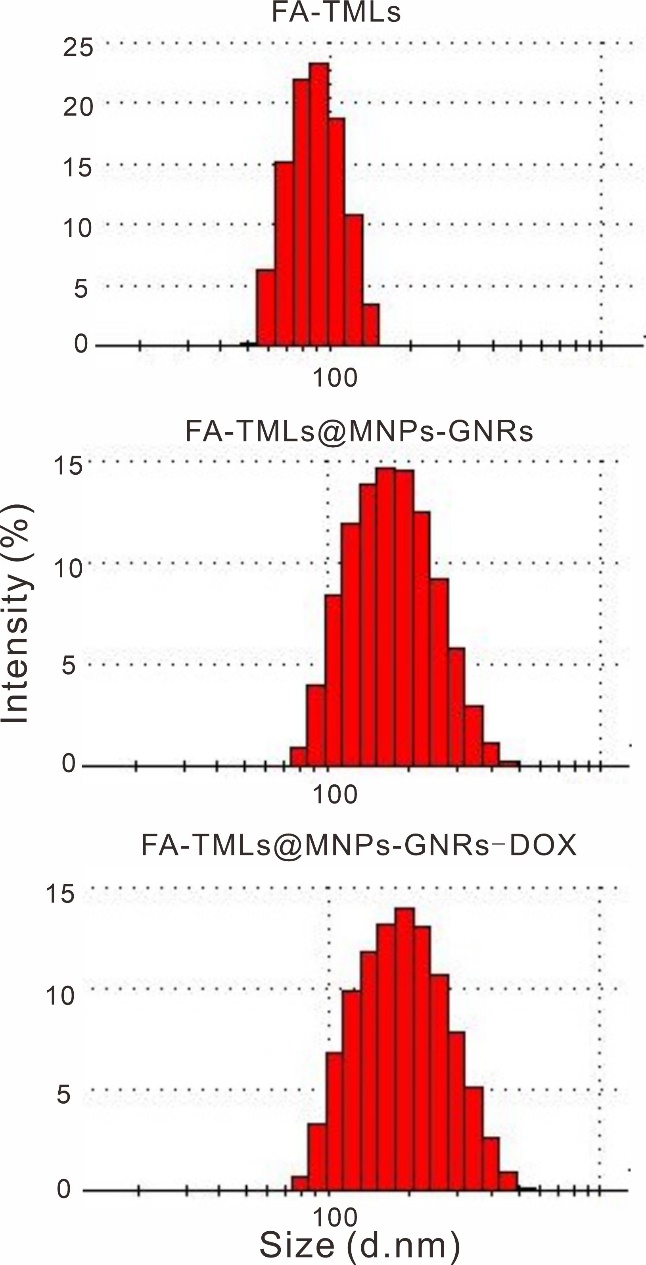
**

**Figure S8.** Size distribution of FA-TMLs, FA-TMLs@MNPs-GNRs, and FA-TMLs@MNPs-GNRs-DOX.

**Table S1.** Particle size distribution of liposomes (n=3)

| Liposome | Size (nm) | PDI |
| --- | --- | --- |
| FA-TMLs | 95 ± 4 | 0.02 |
| FA-TMLs@MNPs-GNRs | 210 ± 5 | 0.14 |
| FA-TMLs@MNPs-GNRs-DOX | 234 ± 5 | 0.11 |


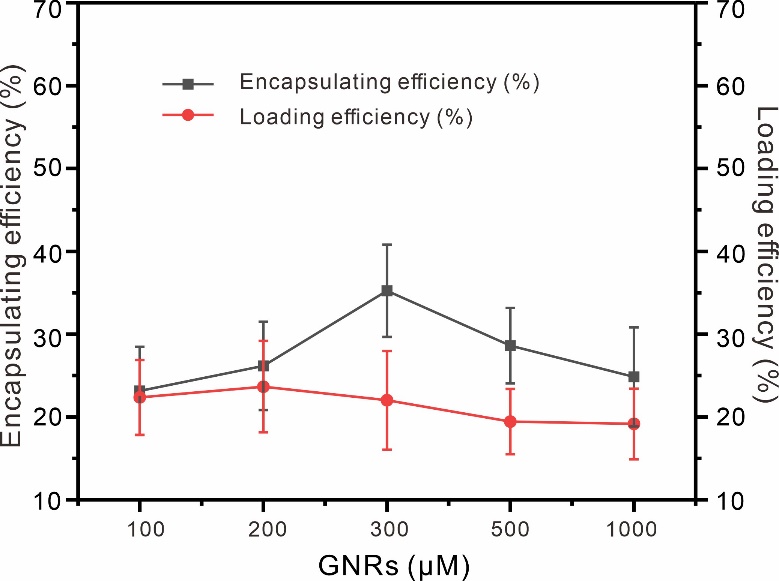


**Figure S9.** The effects of GNRs concentration on encapsulation efficiency and loading efficiency of DOX in FA-TMLs@MNPs-GNRs-DOX.


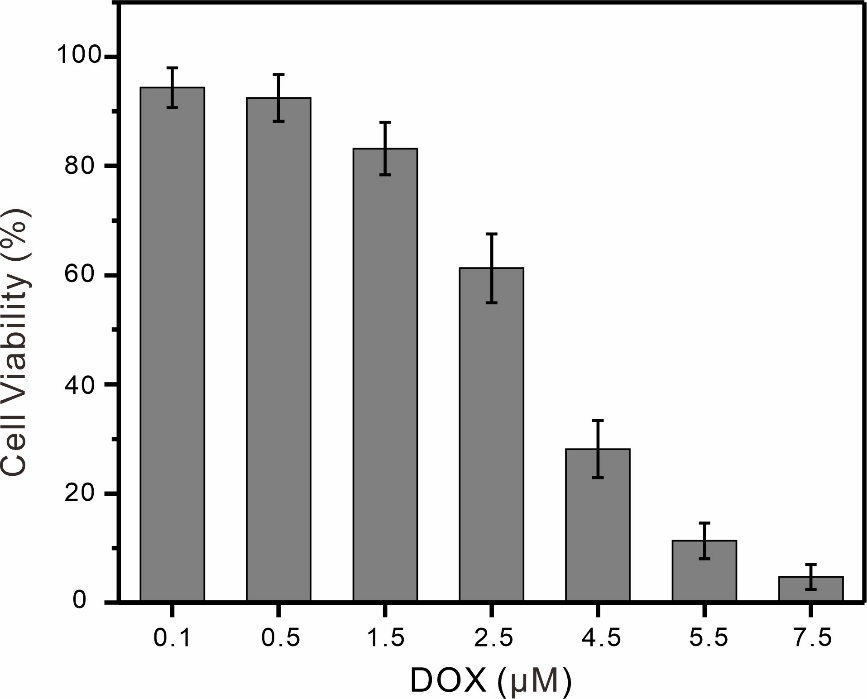


**Figure S10.** The Cytotoxicity of DOX with various concentrations towards bladder cancer cells.

**
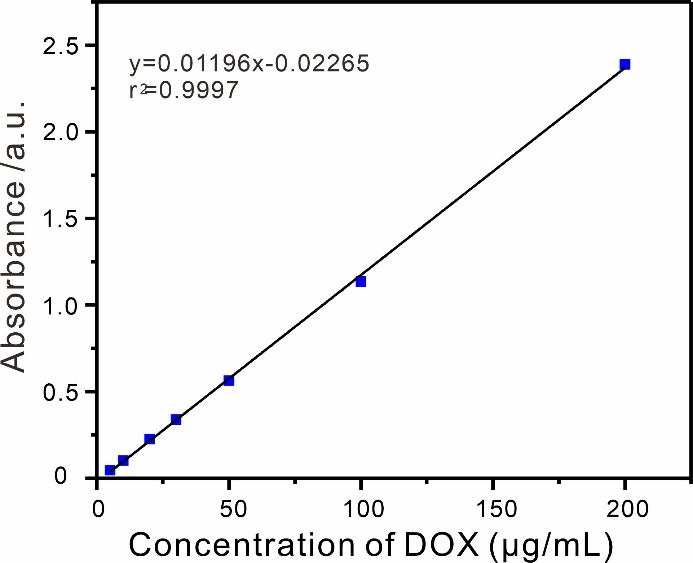
**

**Figure S11.** Standard curve of DOX.


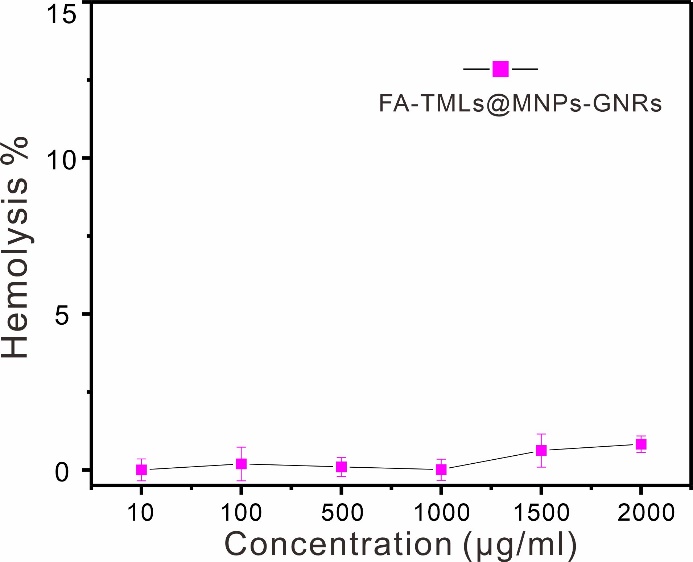


**Figure S12.** Hemolytic activity of FA-TMLs@MNPs-GNRs.

**Reference:**

1. Nikoobakht, B.; El-Sayed, M. A. Preparation and Growth Mechanism of Gold Nanorods (NRs) Using Seed-Mediated Growth Method. *Chem. Mater.* **2003,** 15, 1957-1962.
